# Supplementary material
Source: PubMed Central journal article supplement (PMC3485080)
Supplement: NIHMS399265-supplement-08.pdf [file NIHMS399265-supplement-08.pdf]

## Supplementary Figure Legends

### Supplementary Figure 1

#### **Bmi1 expression is upregulated in the exocrine pancreas at early time points after caerulein injury**

Immunofluorescence for amylase, GFP, and DAPI in the pancreas of adult *Bmi1*<sup>GFP/+</sup> mice 4, 8, and 24 hours after last caerulein injection.

### Supplementary Figure 2

#### **Impaired acinar regeneration is persistent in *Bmi1* KO mice after caerulein injury**

*Control* or *Bmi1* KO mice were injected with caerulein and sacrificed 21 days post-injection.

- (A) Macroscopic views of pancreas (outlined with dashed lines), showing hypoplastic pancreas in *Bmi1* KO mice 21 days post-injection.
- (B) Relative pancreatic weight normalized to body weight. N = 4 mice, each. Means ± SD. \*\* p < 0.01.
- (C) H&E staining and co-staining for amylase/cytokeratin19/DAPI showing impaired exocrine pancreas regeneration with increased duct-like structures and reduced acinar area in *Bmi1* KO pancreas compared to *control* mice 21 days post-injection.

### Supplementary Figure 3

#### **Impaired acinar regeneration after CDE diet induced pancreatitis in *Bmi1* KO mice**

Female *control* and *Bmi1*KO mice were fed with a choline-deficient DL-ethionine-supplemented (CDE) diet for 4 days followed by normal chow. Mice were sacrificed at day 4 and 8 after starting the CDE diet.

- (A) H&E staining showing disorganized acini and edema in *control* and *Bmi1* KO pancreata at day 4 after beginning of the CDE diet.
- (B) Analyses of *Bmi1*<sup>GFP/+</sup> pancreata at day 4 after starting the CDE diet. Costaining for clusterin/GFP/DAPI in sections from *Bmi1*<sup>GFP/+</sup> mice shows coexpression of GFP and clusterin. Immunohistochemistry for Bmi1 or Sox9 shows Bmi1 and Sox9 expression in damaged acinar cells.
- (C) Analysis of *control* and *Bmi1* KO pancreata at day 8 after starting the CDE diet. H&E staining and co-staining for amylase/CK19/DAPI showing impaired exocrine pancreas regeneration in *Bmi1* KO pancreas compared to *control* mice. Co-staining for cleaved Caspase 3/E-cadherin/DAPI reveals presence of apoptotic cells in *Bmi1* KO pancreata. Arrows indicate cleaved caspase3/E-cadherin double positive cells.

### Supplementary Figure 4

#### **Characterization of initial stage of pancreatitis in *Bmi1* KO mice**

- (A) H&E staining showing duct-like structures in *control* and *Bmi1* KO pancreata on day1 and day2 post-caerulein injection.
- (B) Co-staining for amylase/CK19/DAPI in *control* and *Bmi1* KO pancreata on day1 and day2 post-caerulein injection.
- (C) Co-staining for clusterin/Sox9 in *control* and *Bmi1* KO pancreata on day2 post-caerulein

injection.

### **Supplementary Figure 5**

#### **Initial pancreatitis severity appears to be comparable between *Bmi1 KO* and *control* mice after caerulein injury**

- (A) Serum level of amylase in *control* and *Bmi1 KO* pancreata before caerulein injury and on day1 post-caerulein injection.
- (B) H&E staining in *control* and *Bmi1 KO* lung on day1 and day2 post-caerulein injection.
- (C) Co-staining for CD45/myeloperoxidase (MPO) with DAPI in *control* and *Bmi1 KO* lung on day2 post-caerulein injection.

### **Supplementary Figure 6**

#### **Initial pancreatic inflammation appears comparable between *Bmi1 KO* and *control* mice after caerulein injury**

Immunohistochemistry for CD45 and F4/80 in *control* and *Bmi1 KO* pancreata on day1 and day2 post-caerulein injection.

### **Supplementary Figure 7**

#### **Reconstituted *Bmi1 KO* chimera mice after *WT* bone marrow transplantation**

*Wild type* bone marrow was transplanted into irradiated *Bmi1 KO* mice at 6-8 weeks of age. 8 weeks after bone marrow transplantation, the reconstituted *Bmi1 KO* chimera mice were subjected to caerulein pancreatitis. Mice were sacrificed 7 days after caerulein treatment.

- (A) Flow cytometry analysis of chimeric spleens in *WT* reconstituted *Bmi1 KO* chimera mice contain abundant *WT*, non-GFP positive, CD45-positive cells.
- (B) Genotyping PCR reveals presence of *Bmi1* wild type alleles in splenic cells isolated from the reconstituted *Bmi1 KO* chimera mice (N = 3)
