# Supplementary material
Source: PubMed Central journal article supplement (PMC3485080)

Supplementary Figure 1

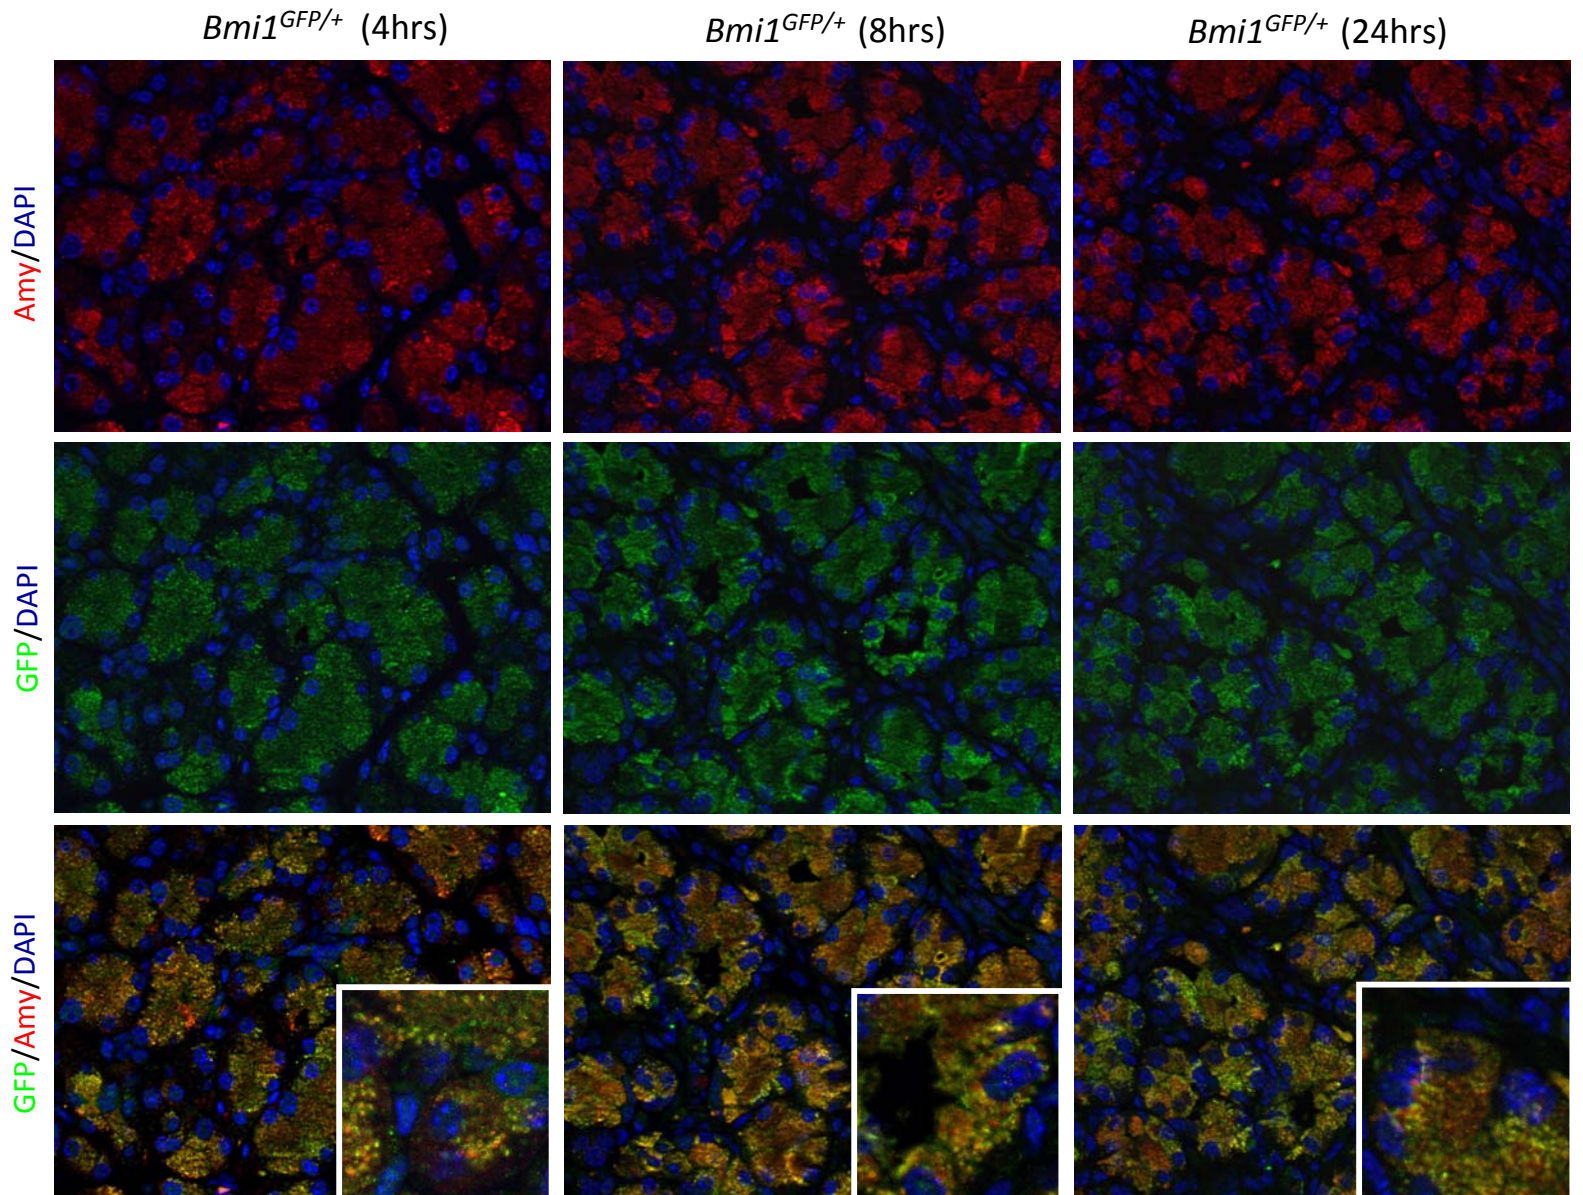

Supplement: NIHMS399265-supplement-01.pdf [file NIHMS399265-supplement-01.pdf]

Supplementary Figure 2

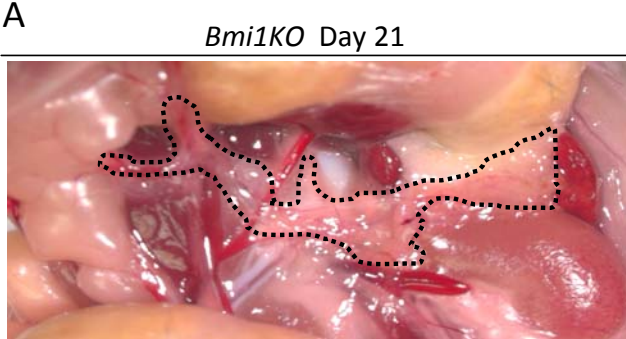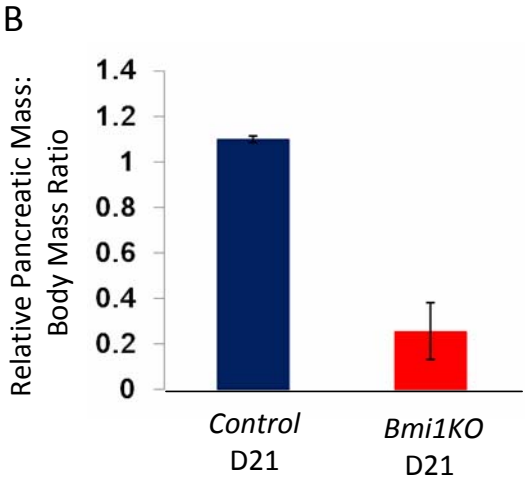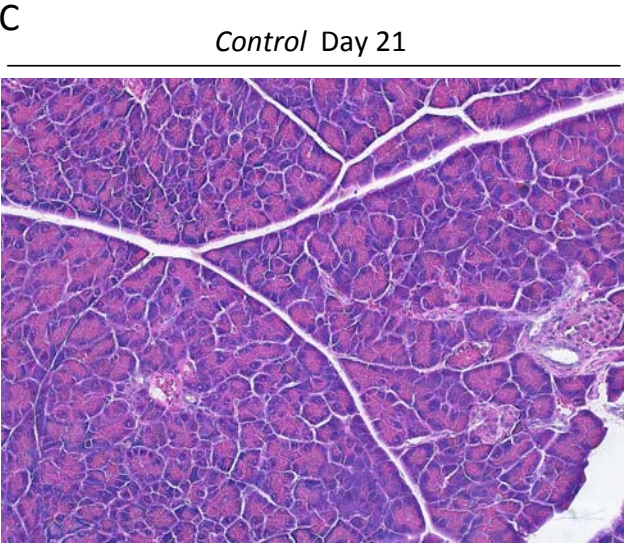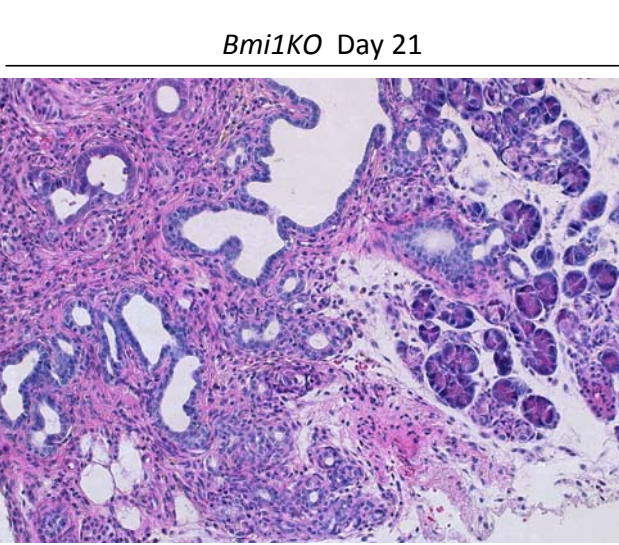

H&E

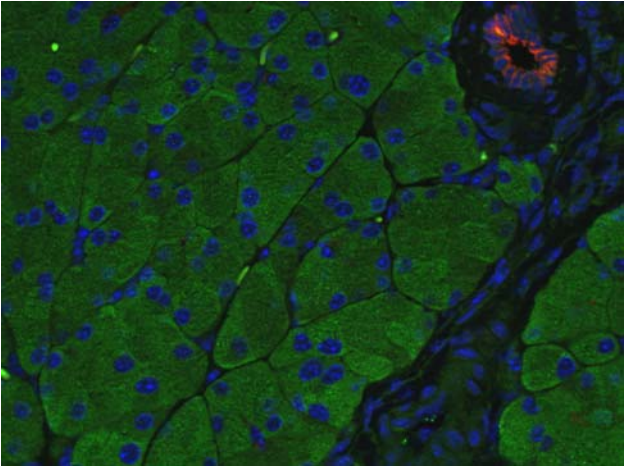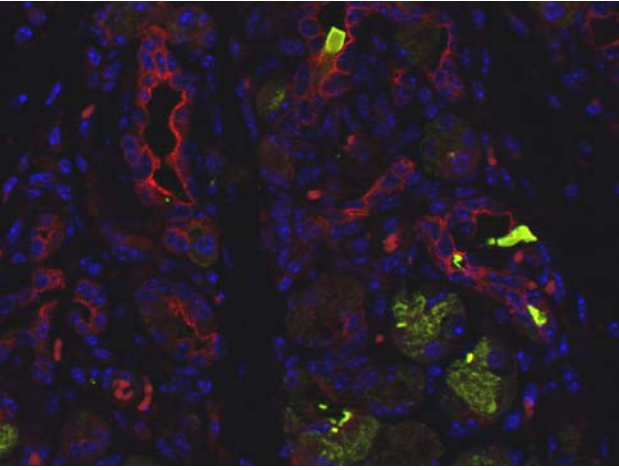

Amy/CK19

Supplement: NIHMS399265-supplement-02.pdf [file NIHMS399265-supplement-02.pdf]

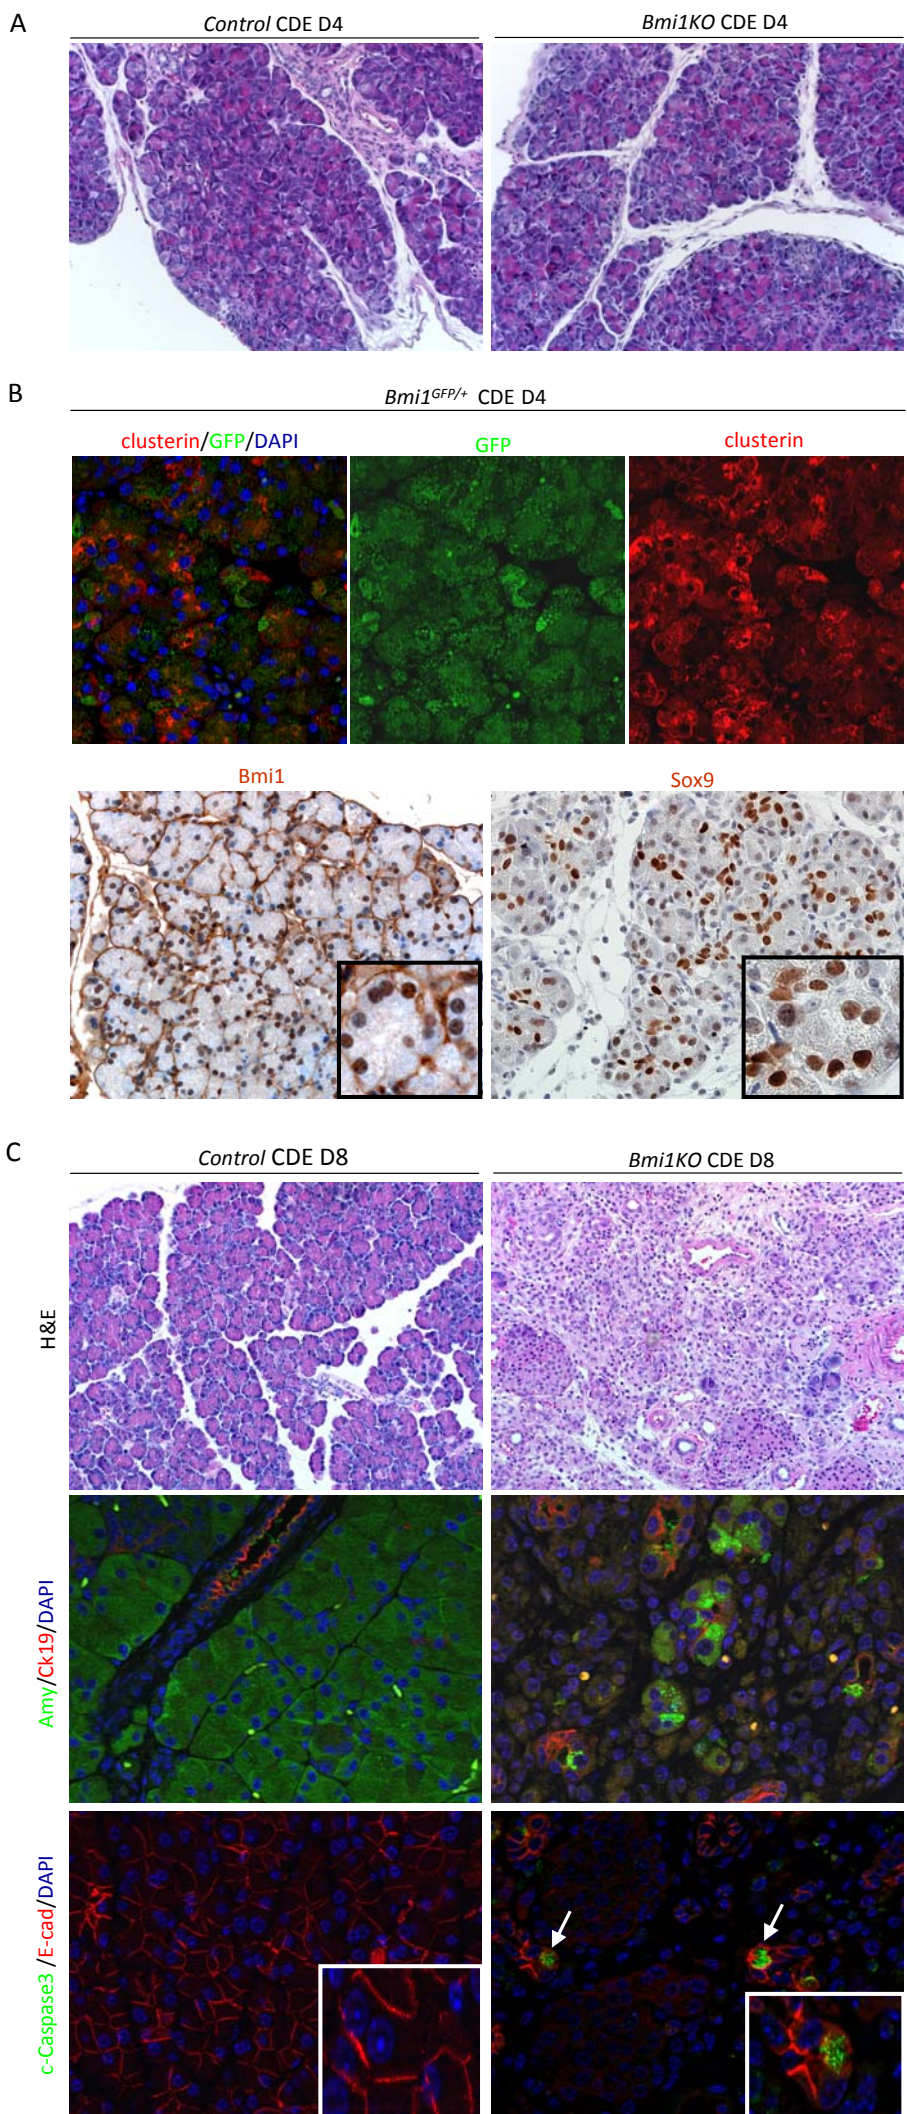

Supplement: NIHMS399265-supplement-03.pdf [file NIHMS399265-supplement-03.pdf]

A

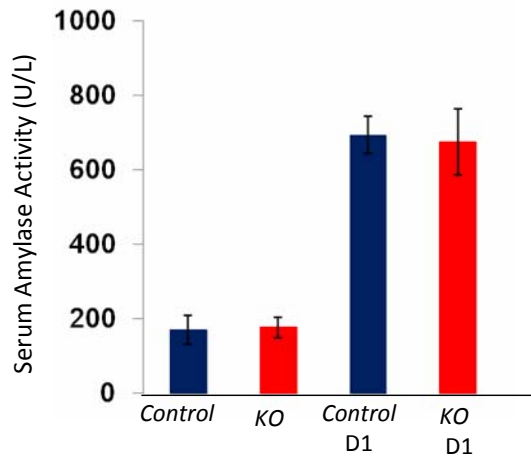

B

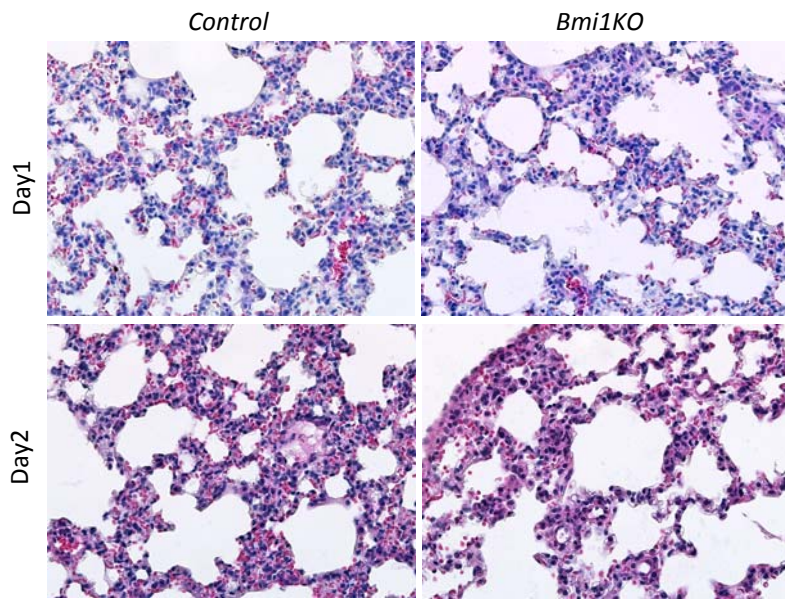

C

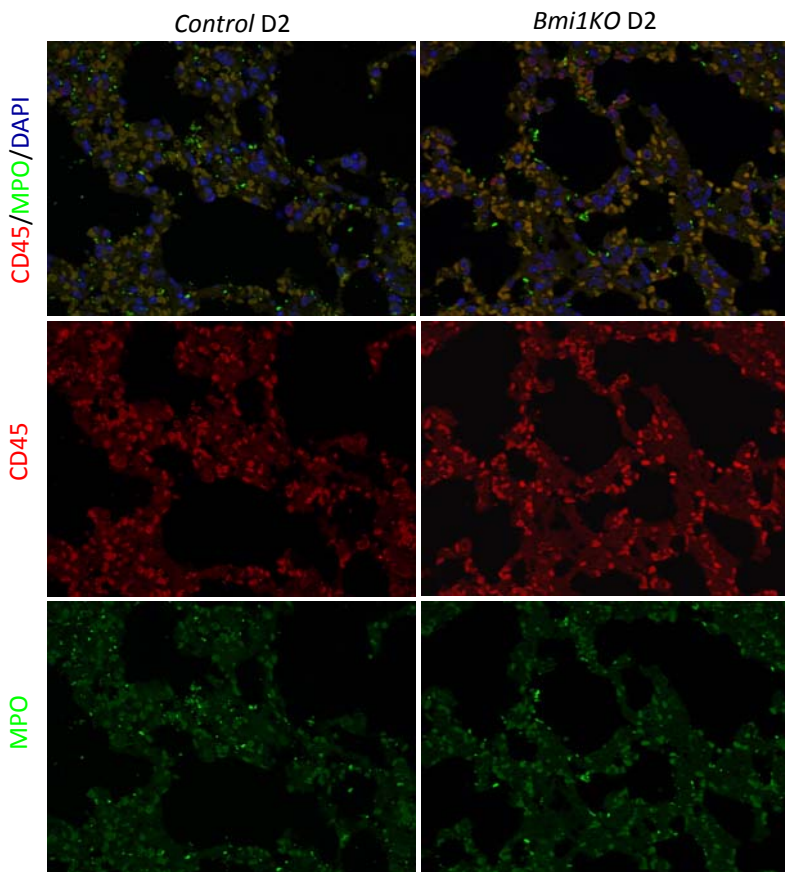

Supplement: NIHMS399265-supplement-05.pdf [file NIHMS399265-supplement-05.pdf]

Supplementary Figure 6

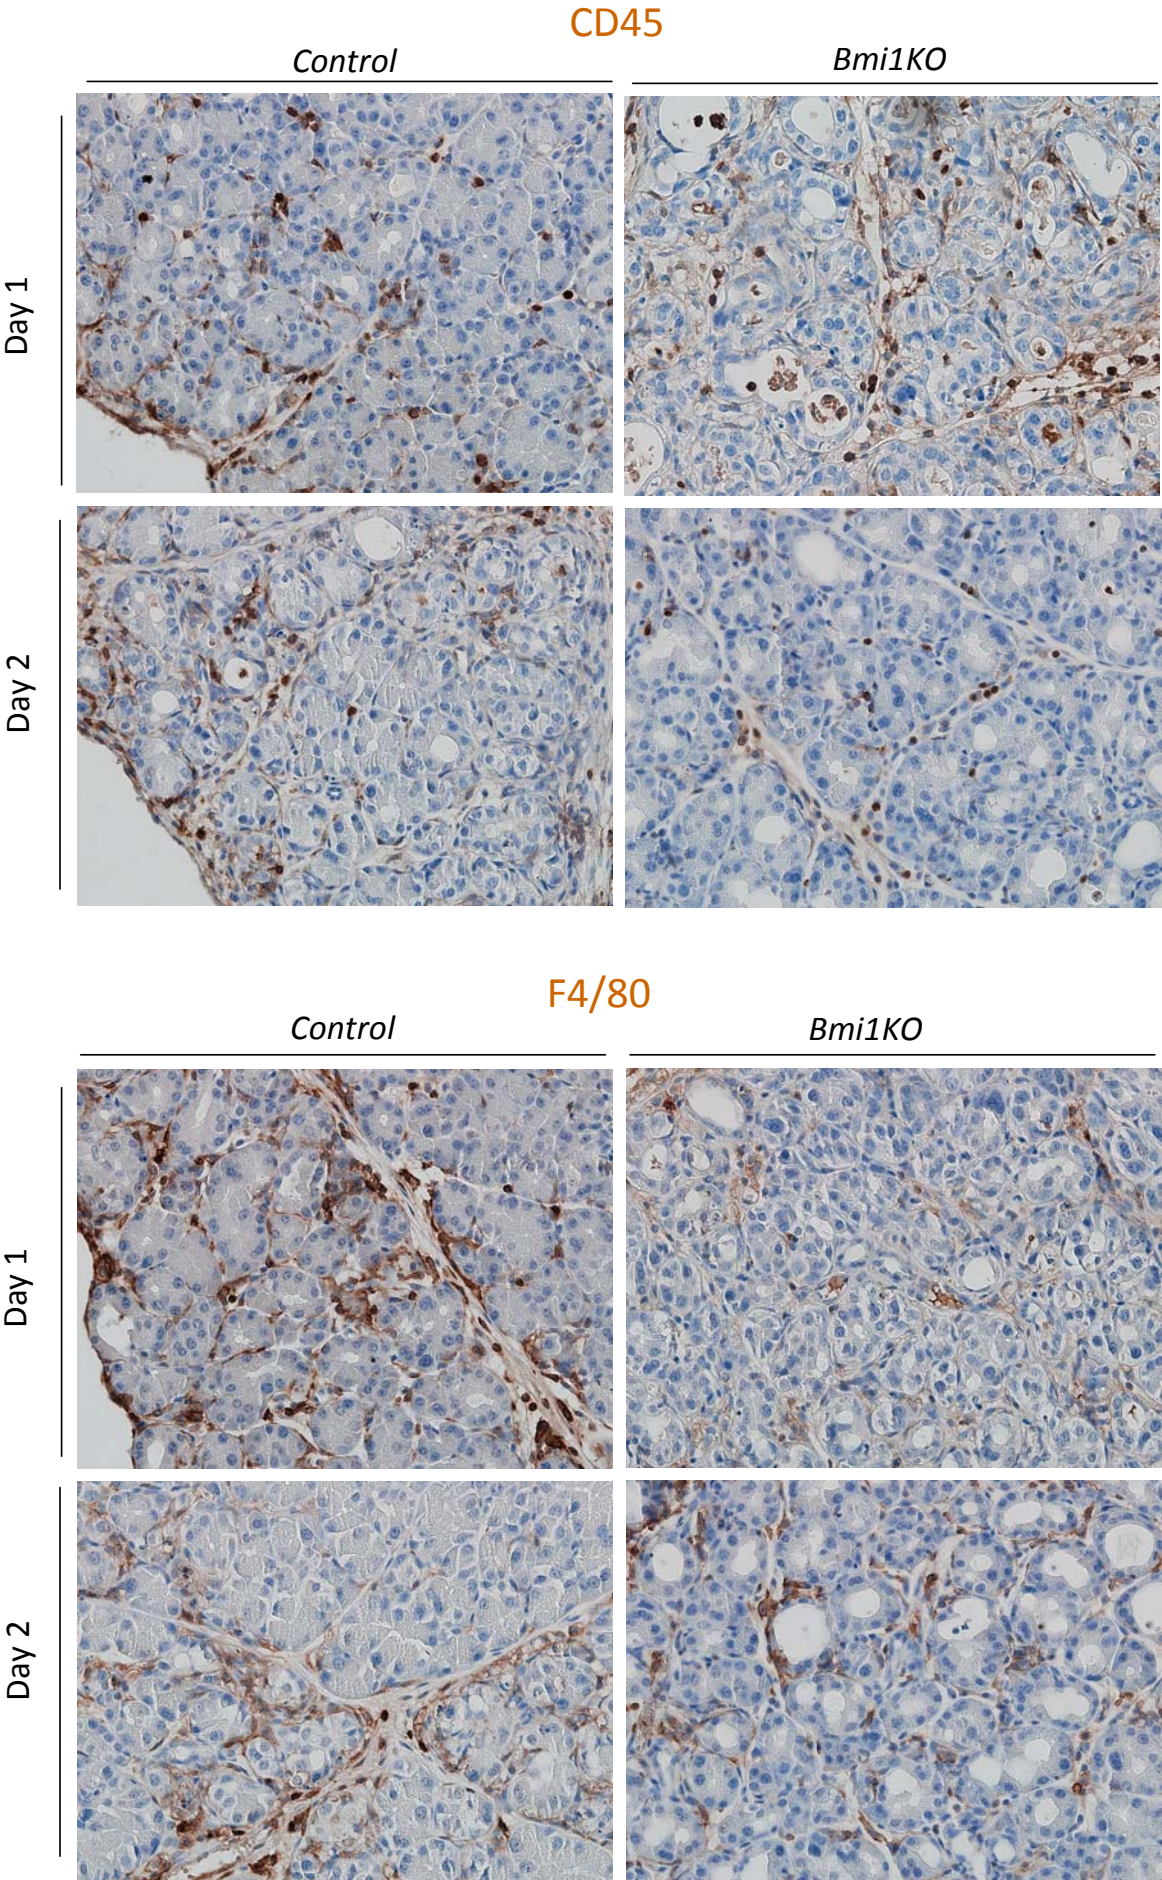

Supplement: NIHMS399265-supplement-06.pdf [file NIHMS399265-supplement-06.pdf]

Supplementary Figure 7

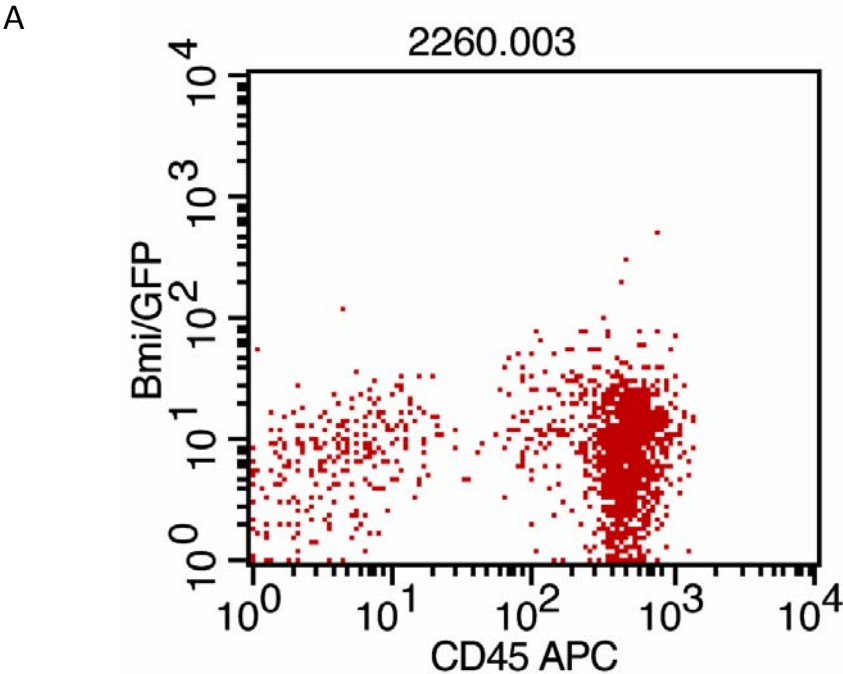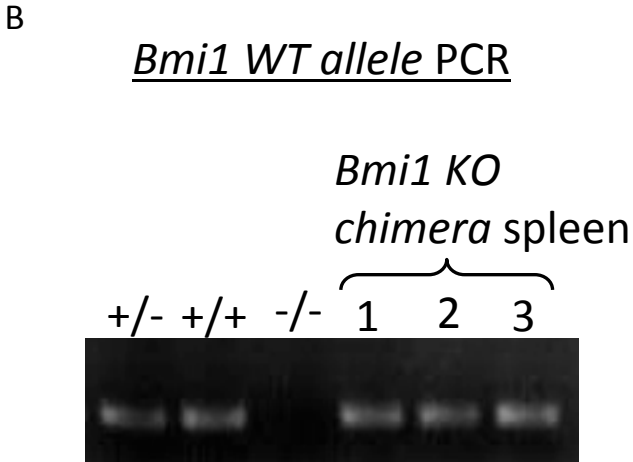

Supplement: NIHMS399265-supplement-07.pdf [file NIHMS399265-supplement-07.pdf]
